# Supplementary material for: Factors Associated With Hospitalization or Intensive Care Admission in Children With COVID-19 in Latin America
Source: PubMed Central journal article supplement (PMC9048675; doi:10.3389/fped.2022.868297), 2022-04-14
Supplement: Data_Sheet_1.pdf [file Data_Sheet_1.pdf]

**Supplementary Table 1****Proportion of patients with specific clinical presentations according to age groups.**

|                             | No respiratory symptoms or fever* | Diarrhea without respiratory symptoms* |
|-----------------------------|-----------------------------------|----------------------------------------|
| All patients, n=1063 (n, %) | 104 (9.8%)                        | 96 (9.0%)                              |
| < 1 year, n=241             | 13 (5.4%)                         | 19 (7.9%)                              |
| 1-5 years, n=386            | 39 (10.1%)                        | 52 (13.5%)                             |
| 6-9 years, n=176            | 14 (7.9%)                         | 11 (6.2%)                              |
| >10 years, n=260            | 38 (14.6%)                        | 14 (5.4%)                              |

\*P<0.01 for the age distribution

**Supplementary Table 2.**  
**Frequency of missing data for each variable**

| Characteristic                                                  | All patients<br>(n=1063) | OutPatient<br>care<br>(n=563) | Hospitalized            |                |
|-----------------------------------------------------------------|--------------------------|-------------------------------|-------------------------|----------------|
|                                                                 |                          |                               | General Ward<br>(n=419) | PICU<br>(n=81) |
| Age                                                             | 0 (0.0)                  | 0 (0.0)                       | 0 (0.0)                 | 0 (0.0)        |
| Sex                                                             | 0 (0.0)                  | 0 (0.0)                       | 0 (0.0)                 | 0 (0.0)        |
| Race or ethnic group <sup>a</sup>                               | 76 (7.1)                 | 46 (8.2)                      | 23 (5.5)                | 7 (8.6)        |
| Population                                                      | 183 (17.2)               | 148 (26.3)                    | 34 (8.1)                | 1 (1.2)        |
| Level of education of caregiver                                 | 815 (76.7)               | 448 (79.6)                    | 309 (73.7)              | 58 (71.6)      |
| Full immunization coverage                                      | 204 (19.2)               | 86 (15.3)                     | 109 (26.0)              | 9 (11.1)       |
| BMI <sup>b</sup>                                                | 501 (47.1)               | 304 (54.0)                    | 177 (42.2)              | 20 (24.7)      |
| Co-morbidities                                                  | 0 (0.0)                  | 0 (0.0)                       | 0 (0.0)                 | 0 (0.0)        |
| Symptoms or Signs described or present on<br>initial evaluation |                          |                               |                         |                |
| Anosmia                                                         | 2 (0.2)                  | 0 (0.0)                       | 2 (0.5)                 | 0 (0.0)        |
| Dysgeusia                                                       | 2 (0.2)                  | 0 (0.0)                       | 2 (0.5)                 | 0 (0.0)        |
| Skin rash                                                       | 4 (0.4)                  | 1 (0.2)                       | 3 (0.7)                 | 0 (0.0)        |
| Conjunctivitis                                                  | 4 (0.4)                  | 1 (0.2)                       | 3 (0.7)                 | 0 (0.0)        |
| Abdominal pain                                                  | 52 (4.9)                 | 20 (3.5)                      | 25 (5.9)                | 7 (8.6)        |
| Fever                                                           | 1 (0.1)                  | 0 (0.0)                       | 1 (0.2)                 | 0 (0.0)        |
| Cough                                                           | 2 (0.2)                  | 0 (0.0)                       | 2 (0.5)                 | 0 (0.0)        |
| Pharyngitis                                                     | 4 (0.4)                  | 0 (0.0)                       | 4 (0.9)                 | 0 (0.0)        |
| Rhinitis                                                        | 3 (0.3)                  | 0 (0.0)                       | 3 (0.7)                 | 0 (0.0)        |
| Headache                                                        | 5 (0.5)                  | 0 (0.0)                       | 5 (1.2)                 | 0 (0.0)        |
| Myalgia                                                         | 8 (0.7)                  | 2 (0.4)                       | 6 (1.4)                 | 0 (0.0)        |
| Malaise                                                         | 5 (0.5)                  | 1 (0.2)                       | 4 (0.9)                 | 0 (0.0)        |
| Diarrhea                                                        | 4 (0.4)                  | 0 (0.0)                       | 4 (0.9)                 | 0 (0.0)        |
| Vomit                                                           | 4 (0.4)                  | 0 (0.0)                       | 4 (0.9)                 | 0 (0.0)        |
| Dyspnea                                                         | 3 (0.3)                  | 2 (0.4)                       | 1 (0.2)                 | 0 (0.0)        |
| Hypoxia                                                         | 3 (0.3)                  | 2 (0.4)                       | 1 (0.2)                 | 0 (0.0)        |
| Hemoptysis                                                      | 5 (0.5)                  | 2 (0.4)                       | 3 (0.7)                 | 0 (0.0)        |
| Altered mental status                                           | 5 (0.5)                  | 2 (0.4)                       | 3 (0.7)                 | 0 (0.0)        |
| Seizures                                                        | 5 (0.5)                  | 2 (0.4)                       | 2 (0.5)                 | 1 (1.2)        |
| Dehydration                                                     | 8 (0.7)                  | 3 (0.5)                       | 4 (0.9)                 | 1 (1.2)        |

|                                           |            |            |            |           |
|-------------------------------------------|------------|------------|------------|-----------|
| Shock                                     | 6 (0.6)    | 4 (0.7)    | 2 (0.5)    | 0 (0.0)   |
| <b>Onset of symptoms to, median (IQR)</b> | 42 (3.9)   | 9 (1.6)    | 33 (7.9)   | 0 (0.0)   |
| <b>Laboratory values</b>                  |            |            |            |           |
| Hemoglobin                                | 485 (45.6) | 434 (77.1) | 47 (11.2)  | 4 (4.9)   |
| Platelets                                 | 466 (43.8) | 434 (77.1) | 28 (6.7)   | 4 (4.9)   |
| White blood cells                         | 457 (43.0) | 432 (76.7) | 22 (5.2)   | 3 (3.7)   |
| Neutrophils                               | 460 (43.3) | 433 (76.9) | 22 (5.2)   | 5 (6.2)   |
| Lymphocytes                               | 463 (43.6) | 433 (76.9) | 25 (6.0)   | 5 (6.2)   |
| Neutrophil to lymphocyte ratio            | 464 (43.6) | 433 (76.9) | 26 (6.2)   | 5 (6.2)   |
| C-reactive protein                        | 547 (51.5) | 449 (79.7) | 87 (20.8)  | 11 (6.2)  |
| <b>Chest radiograph</b>                   | 503 (43.3) | 387 (68.7) | 106 (25.2) | 10 (12.3) |

Abbreviations: PICU, pediatric intensive care unit; BMI, body mass index (calculated as weight in kilograms divided by height in meters squared); IQR, interquartile range;

<sup>a</sup> Race/ethnic group was collected by study personnel based on auto reporting by the study participants. “Mixed race” refers to an individual of mixed European/Native heritage.

<sup>b</sup> BMI, Body mass index was calculated as weight in kilograms divided by height in meters squared

**Supplementary Table 3.**  
**Characteristics of Hospital Admission Among the 500 Hospitalized Children**

|                                                      | <b>General Ward<br/>(n=419)</b> | <b>PICU<br/>(n=81)</b> |
|------------------------------------------------------|---------------------------------|------------------------|
| <b>Hospital length of stay in days, Median (IQR)</b> | 5 (3 to 7)                      | 12 (8 to 20.1)         |
| <b>PICU length of stay in days, Median (IQR)</b>     | -                               | 5 (2 to 10)            |
| <b>Intubation, No. (%)</b>                           | -                               | 31 (38.3)              |
| <b>Intubation duration in days, Median (IQR)</b>     | -                               | 5 (3 to 10)            |
| <b>Oxygen, No. (%)</b>                               | 151 (36.0)                      | 70 (86.4)              |
| <b>Oxygen duration in days, Median (IQR)</b>         | 3 (2 to 5)                      | 7 (4 to 17)            |

Abbreviations: PICU, Pediatric intensive care unit

**Supplementary Table 4.**

**Demographic and clinical characteristics associated with hospitalization (general ward and intensive care) among all patients (analysis using the complete dataset including missing data), and patients included in cities that used an active surveillance system (analysis using multiple imputation chained equations for missing data).**

| Characteristic                                   | All patients. Complete Dataset, including missing data |                         |                                 |                                    | Patients from Active Surveillance Sites. Multiple Imputation |                         |                                 |                                    |
|--------------------------------------------------|--------------------------------------------------------|-------------------------|---------------------------------|------------------------------------|--------------------------------------------------------------|-------------------------|---------------------------------|------------------------------------|
|                                                  | Outpatient care (n=563)                                | Hospitalization (n=500) | Univariate analysis OR (95% CI) | Multivariable analysis OR (95% CI) | Outpatient care (n=526)                                      | Hospitalization (n=319) | Univariate analysis OR (95% CI) | Multivariable analysis OR (95% CI) |
| <b>Age groups, y No. (%)</b>                     |                                                        |                         |                                 |                                    |                                                              |                         |                                 |                                    |
| <1                                               | 109 (19.4)                                             | 132 (26.4)              | 1.42 (0.86 to 2.34)             | 1.78 (0.98 to 3.21)                | 100 (19.0)                                                   | 70 (21.9)               | 1.16 (0.84 to 1.59)             | 2.11 (1.25 to 3.55)                |
| 1-5                                              | 214 (38.0)                                             | 172 (34.4)              | 0.94 (0.75 to 1.18)             | 1.15 (0.92 to 1.44)                | 204 (38.8)                                                   | 117 (36.7)              | 0.95 (0.69 to 1.31)             | 1.43 (1.02 to 1.99)                |
| 6-10                                             | 95 (16.9)                                              | 81 (16.2)               | Ref.                            | Ref.                               | 91 (17.3)                                                    | 55 (17.2)               | Ref.                            | Ref.                               |
| ≥10                                              | 145 (25.7)                                             | 115 (23.0)              | 0.93 (0.66 to 1.31)             | 0.91 (0.51 to 1.62)                | 131 (24.9)                                                   | 77 (24.1)               | 0.97 (0.69 to 1.37)             | 1.07 (0.49 to 2.31)                |
| <b>Sex, No. (%)</b>                              |                                                        |                         |                                 |                                    |                                                              |                         |                                 |                                    |
| Male                                             | 291 (51.7)                                             | 279 (55.8)              | Ref.                            | -                                  | 270 (51.3)                                                   | 183 (57.4)              | Ref.                            | -                                  |
| Female                                           | 272 (48.3)                                             | 221 (44.2)              | 0.85 (0.68 to 1.06)             | -                                  | 256 (48.7)                                                   | 136 (42.6)              | 0.78 (0.59 to 1.03)             | -                                  |
| <b>Race or ethnic group<sup>a</sup>, No. (%)</b> |                                                        |                         |                                 |                                    |                                                              |                         |                                 |                                    |
| Caucasian                                        | 285 (55.1)                                             | 174 (37.0)              | Ref.                            | Ref.                               | 283 (58.7)                                                   | 164 (54.3)              | Ref.                            | -                                  |
| Native                                           | 3 (0.6)                                                | 13 (2.8)                | 7.09 (2.3 to 21.64)             | 6.27 (2.59 to 15.19)               | 0 (0.0)                                                      | 3 (1.0)                 | -                               | -                                  |
| Black or African American                        | 6 (1.2)                                                | 3 (0.6)                 | 0.82 (0.10 to 6.87)             | 0.86 (0.14 to 5.32)                | 6 (1.2)                                                      | 1 (0.3)                 | 0.29 (0.03 to 3.62)             | -                                  |
| Mixed race                                       | 223 (43.1)                                             | 280 (59.6)              | 2.06 (0.54 to 7.83)             | 1.87 (0.55 to 6.37)                | 193 (40.0)                                                   | 134 (44.4)              | 1.20 (0.48 to 2.98)             | -                                  |
| <b>Population, No. (%)</b>                       |                                                        |                         |                                 |                                    |                                                              |                         |                                 |                                    |
| Urban                                            | 393 (94.7)                                             | 414 (89.0)              | Ref.                            | -                                  | 362 (95.8)                                                   | 267 (93.7)              | Ref.                            | -                                  |
| Rural                                            | 22 (5.3)                                               | 51 (11.0)               | 2.20 (1.42 to 3.40)             | -                                  | 16 (4.2)                                                     | 18 (6.3)                | 1.32 (0.69 to 2.53)             | -                                  |
| <b>Full immunization coverage, No. (%)</b>       |                                                        |                         |                                 |                                    |                                                              |                         |                                 |                                    |
| Yes                                              | 435 (91.2)                                             | 335 (87.7)              | 0.69 (0.31 to 1.54)             | -                                  | 420 (91.1)                                                   | 249 (90.9)              | 0.85 (0.45 to 1.63)             | -                                  |
| <b>Nutritional status<sup>b</sup> No. (%)</b>    |                                                        |                         |                                 |                                    |                                                              |                         |                                 |                                    |
| Thinness                                         | 17 (6.6)                                               | 48 (15.8)               | 2.67 (2.00 to 3.56)             | -                                  | 16 (6.5)                                                     | 32 (16.7)               | 1.58 (0.78 to 3.19)             | -                                  |
| Normal Weight                                    | 173 (66.8)                                             | 183 (60.4)              | Ref.                            | -                                  | 167 (67.9)                                                   | 116 (60.7)              | Ref.                            | -                                  |
| Overweight                                       | 47 (18.1)                                              | 36 (11.9)               | 0.72 (0.48 to 1.11)             | -                                  | 41 (16.7)                                                    | 19 (9.9)                | 0.80 (0.44 to 1.46)             | -                                  |
| Obese                                            | 22 (8.5)                                               | 36 (11.9)               | 1.55 (0.90 to 2.67)             | -                                  | 22 (8.9)                                                     | 24 (12.6)               | 1.17 (0.69 to 1.97)             | -                                  |
| <b>Co-morbidities- No. (%)</b>                   |                                                        |                         |                                 |                                    |                                                              |                         |                                 |                                    |
| Chronic lung disease                             | 54 (9.6)                                               | 69 (13.8)               | 1.51 (0.75 to 3.04)             | -                                  | 50 (9.5)                                                     | 63 (19.7)               | 2.34 (1.44 to 3.80)             | <b>3.33 (1.83 to 6.09)</b>         |
| Congenital heart disease                         | 6 (1.1)                                                | 12 (2.40)               | 2.28 (0.55 to 9.51)             | -                                  | 5 (0.9)                                                      | 5 (1.6)                 | 1.66 (0.2 to 12.83)             | -                                  |
| Chronic gastrointestinal disease                 | 2 (0.4)                                                | 7 (1.40)                | 3.98 (1.40 to 11.31)            | 3.21 (1.21 to 8.53)                | 2 (0.4)                                                      | 4 (1.2)                 | 3.33 (1.29 to 8.56)             | -                                  |

|                                 |          |           |                      |                       |         |           |                       |                        |
|---------------------------------|----------|-----------|----------------------|-----------------------|---------|-----------|-----------------------|------------------------|
| Neurologic disease              | 7 (1.2)  | 52 (10.4) | 9.22 (3.8 to 22.34)  | 10.85 (4.25 to 27.72) | 6 (1.1) | 42 (13.2) | 13.14 (6.53 to 26.44) | 16.97 (7.57 to 38.05)  |
| Metabolic or endocrine disorder | 1 (0.2)  | 7 (1.40)  | 7.98 (0.99 to 64.09) | 10.22 (1.71 to 61.01) | 1 (0.2) | 4 (1.2)   | 6.67 (0.82 to 54.59)  | 10.95 (1.77 to 67.81)  |
| Immune deficiency               | 13 (2.3) | 75 (15.0) | 7.48 (2.78 to 20.1)  | 8.89 (2.80 to 28.20)  | 8 (1.5) | 54 (16.9) | 13.19 (6.3 to 27.5)   | 21.44 (11.08 to 41.46) |
| Preterm birth                   | 9 (1.6)  | 24 (4.8)  | 3.10 (1.58 to 6.10)  | 2.59 (1.30 to 5.17)   | 9 (1.7) | 21 (6.6)  | 4.05 (2.35 to 6.97)   | 2.99 (1.75 to 5.11)    |

Abbreviations: OR, odds ratio; IQR, interquartile range

<sup>a</sup> Race/ethnic group was collected by study personnel based on auto reporting by the study participants. "Mixed race" refers to an individual of mixed European/Native heritage <sup>b</sup> Nutritional status was classified based on standard deviations for body mass index according to the World Health Organization into thinness (below -2 standard deviations [SD]), normal nutritional status (between -2 and +1 SD), overweight (between +1 and +2 SD) and obesity (above +2 SD). Body mass index was calculated as weight in kilograms divided by height in meters squared

**Supplementary Table 5.**

**Presenting signs and symptoms associated with hospitalization (general ward and intensive care) among all patients (analysis using the complete dataset including missing data), and patients included in cities that used an active surveillance system (analysis using multiple imputation chained equations for missing data).**

| Symptoms or Signs described or present on admission- No. (%) | All patients. Complete Dataset, including missing data |                         |                                 |                                    | Patients from Active Surveillance Sites. Multiple Imputation |                         |                                 |                                    |
|--------------------------------------------------------------|--------------------------------------------------------|-------------------------|---------------------------------|------------------------------------|--------------------------------------------------------------|-------------------------|---------------------------------|------------------------------------|
|                                                              | OutPatient care (n=563)                                | Hospitalization (n=500) | Univariate analysis OR (95% CI) | Multivariable analysis OR (95% CI) | OutPatient care (n=526)                                      | Hospitalization (n=319) | Univariate analysis OR (95% CI) | Multivariable analysis OR (95% CI) |
| Anosmia                                                      | 19 (4.7)                                               | 6 (1.8)                 | 0.36 (0.13 to 1.02)             | -                                  | 17 (4.5)                                                     | 3 (1.3)                 | -                               | -                                  |
| Dysgeusia                                                    | 19 (4.7)                                               | 8 (2.3)                 | 0.48 (0.21 to 1.08)             | -                                  | 16 (4.2)                                                     | 4 (1.7)                 | -                               | -                                  |
| Skin rash                                                    | 11 (2.0)                                               | 23 (4.6)                | 2.43 (1.41 to 4.19)             | 2.72 (1.48 to 4.97)                | 11 (2.1)                                                     | 11 (3.4)                | 1.67 (0.79 to 3.50)             | 2.53 (1.01 to 6.32)                |
| Conjunctivitis                                               | 8 (1.4)                                                | 7 (1.4)                 | 0.99 (0.47 to 2.07)             | -                                  | 6 (1.1)                                                      | 2 (0.6)                 | 0.54 (0.19 to 1.52)             | -                                  |
| Abdominal pain                                               | 62 (11.4)                                              | 65 (13.9)               | 1.25 (0.94 to 1.66)             | -                                  | 59 (11.7)                                                    | 44 (14.4)               | 1.24 (0.97 to 1.60)             | 2.48 (1.46 to 4.21)                |
| Fever                                                        | 424 (75.3)                                             | 321 (64.3)              | 0.59 (0.29 to 1.21)             | -                                  | 407 (77.4)                                                   | 221 (69.5)              | 0.66 (0.33 to 1.35)             | -                                  |
| Cough                                                        | 324 (57.5)                                             | 256 (51.4)              | 0.78 (0.46 to 1.32)             | -                                  | 307 (58.4)                                                   | 178 (56.1)              | 0.91 (0.41 to 1.99)             | -                                  |
| Pharyngitis                                                  | 177 (31.4)                                             | 71 (14.3)               | 0.36 (0.29 to 0.45)             | 0.33 (0.23 to 0.46)                | 172 (32.7)                                                   | 50 (15.8)               | 0.38 (0.32 to 0.47)             | 0.42 (0.29 to 0.60)                |
| Rhinitis                                                     | 181 (32.1)                                             | 133 (26.8)              | 0.77 (0.31 to 1.90)             | -                                  | 166 (31.6)                                                   | 94 (29.6)               | 0.91 (0.39 to 2.15)             | -                                  |
| Headache                                                     | 114 (20.2)                                             | 48 (9.7)                | 0.42 (0.23 to 0.77)             | -                                  | 106 (20.1)                                                   | 28 (8.8)                | 0.38 (0.18 to 0.82)             | -                                  |
| Myalgia                                                      | 60 (10.7)                                              | 30 (6.1)                | 0.54 (0.27 to 1.07)             | 0.52 (0.29 to 0.94)                | 56 (10.7)                                                    | 19 (6.0)                | 0.53 (0.26 to 1.08)             | 0.51 (0.30 to 0.88)                |
| Malaise                                                      | 182 (32.4)                                             | 159 (32.1)              | 0.98 (0.47 to 2.07)             | -                                  | 172 (32.8)                                                   | 101 (31.9)              | 0.96 (0.47 to 1.93)             | -                                  |
| Diarrhea                                                     | 139 (24.7)                                             | 80 (16.1)               | 0.59 (0.33 to 1.04)             | 0.42 (0.25 to 0.70)                | 131 (24.9)                                                   | 46 (14.5)               | 0.51 (0.23 to 1.11)             | 0.34 (0.17 to 0.69)                |
| Vomit                                                        | 107 (19.0)                                             | 92 (18.5)               | 0.97 (0.55 to 1.70)             | -                                  | 101 (19.2)                                                   | 59 (18.7)               | 0.96 (0.52 to 1.76)             | -                                  |
| Dyspnea                                                      | 41 (7.3)                                               | 190 (38.1)              | 7.80 (4.61 to 13.19)            | -                                  | 37 (7.1)                                                     | 137 (43.1)              | 9.94 (7.01 to 14.09)            | -                                  |
| Hypoxia                                                      | 8 (1.4)                                                | 167 (33.5)              | 34.77 (7.6 to 159.6)            | 34.88 (7.56 to 160.8)              | 5 (0.9)                                                      | 134 (42.1)              | 74.9 (9.66 to 581.43)           | 80.79 (10.22 to 638.-97)           |
| Altered mental status                                        | 4 (0.7)                                                | 39 (7.8)                | 11.85 (3.57 to 39.33)           | -                                  | 3 (0.6)                                                      | 24 (7.6)                | 13.96 (4.26 to 45.77)           | -                                  |
| Seizures                                                     | 8 (1.4)                                                | 38 (7.6)                | 5.72 (1.73 to 18.93)            | 5.27 (1.49 to 18.62)               | 6 (1.1)                                                      | 30 (9.4)                | 8.93 (2.85 to 28.03)            | 11.46 (6.35 to 20.69)              |
| Dehydration                                                  | 7 (1.2)                                                | 60 (12.1)               | 10.89 (3.88 to 30.58)           | 16.54 (4.51 to 60.68)              | 7 (1.3)                                                      | 27 (8.5)                | 6.78 (3.34 to 13.76)            | 9.47 (3.08. to 29.12)              |
| Shock                                                        | 0                                                      | 27 (5.4)                | -                               | -                                  | 0                                                            | 16 (5.0)                | -                               | -                                  |
| <b>Onset of symptoms to, median (IQR)</b>                    | 2 (1-3)                                                | 1 (0-3)                 | 1.01 (0.96 to 1.05)             | -                                  | 2 (1 to 3)                                                   | 1 (0 to 3)              | 0.99 (0.96 to 1.04)             | -                                  |

**Supplementary Table 6.**

**Demographic and clinical characteristics associated with intensive care admission among all patients (analysis using the complete dataset including missing data), and patients included in cities that used an active surveillance system (analysis using multiple imputation chained equations for missing data).**

| Characteristics                                  | All patients. Complete Dataset, including missing data |                                      |                                 |                                    | Patients from Active Surveillance Sites. Multiple Imputation |                                      |                                  |                                    |
|--------------------------------------------------|--------------------------------------------------------|--------------------------------------|---------------------------------|------------------------------------|--------------------------------------------------------------|--------------------------------------|----------------------------------|------------------------------------|
|                                                  | General Ward (n=419)                                   | Pediatric intensive care unit (n=81) | Univariate analysis OR (95% CI) | Multivariable analysis OR (95% CI) | General Ward (n=265)                                         | Pediatric Intensive Care Unit (n=54) | Univariable analysis OR (95% CI) | Multivariable analysis OR (95% CI) |
| <b>Age groups, y No. (%)</b>                     |                                                        |                                      |                                 |                                    |                                                              |                                      |                                  |                                    |
| <1                                               | 113 (27.0)                                             | 19 (23.5)                            | 0.80 (0.53 to 1.22)             | -                                  | 56 (21.1)                                                    | 14 (25.9)                            | 1.12 (0.87 to 1.45)              | -                                  |
| 1-5                                              | 141 (33.6)                                             | 31 (38.3)                            | 1.05 (0.66 to 1.66)             | -                                  | 99 (37.4)                                                    | 18 (33.3)                            | 0.82 (0.61 to 1.09)              | -                                  |
| 6-9                                              | 67 (16.0)                                              | 14 (17.3)                            | Ref.                            | -                                  | 45 (17.0)                                                    | 10 (18.5)                            | Ref.                             | -                                  |
| ≥10                                              | 98 (23.4)                                              | 17 (21.0)                            | 0.83 (0.47 to 1.46)             | -                                  | 65 (24.5)                                                    | 12 (22.2)                            | 0.83 (0.39 to 1.74)              | -                                  |
| <b>Sex, No. (%)</b>                              |                                                        |                                      |                                 |                                    |                                                              |                                      |                                  |                                    |
| Male                                             | 237 (56.6)                                             | 42 (51.9)                            | Ref.                            | -                                  | 151 (57.0)                                                   | 32 (59.3)                            | Ref.                             | -                                  |
| Female                                           | 182 (43.4)                                             | 39 (48.1)                            | 1.21 (0.73 to 2.01)             | -                                  | 114 (43.0)                                                   | 22 (40.7)                            | 0.91 (0.76 to 1.08)              | -                                  |
| <b>Race or ethnic group<sup>a</sup>, No. (%)</b> |                                                        |                                      |                                 |                                    |                                                              |                                      |                                  |                                    |
| Caucasian                                        | 149 (37.6)                                             | 25 (33.8)                            | Ref.                            | -                                  | 144 (56.7)                                                   | 20 (41.7)                            | Ref.                             | -                                  |
| Native                                           | 11 (2.8)                                               | 2 (2.7)                              | 1.08 (0.27 to 4.36)             | -                                  | 2 (0.8)                                                      | 1 (2.1)                              | 4.18 (0.45 to 38.52)             | -                                  |
| Black or African American                        | 3 (0.8)                                                | 0 (0.0)                              | -                               | -                                  | 1 (0.4)                                                      | 0 (0.0)                              | -                                | -                                  |
| Mixed race                                       | 233 (58.8)                                             | 47 (63.5)                            | 1.20 (0.36 to 4.05)             | -                                  | 107 (42.1)                                                   | 27 (56.2)                            | 1.94 (0.36 to 10.40)             | -                                  |
| <b>Population, No. (%)</b>                       |                                                        |                                      |                                 |                                    |                                                              |                                      |                                  |                                    |
| Urban                                            | 347 (90.1)                                             | 67 (83.8)                            | Ref.                            | Ref.                               | 219 (94.4)                                                   | 48 (90.6)                            | Ref.                             | -                                  |
| Rural                                            | 38 (9.9)                                               | 13 (16.2)                            | 1.77 (1.06 to 2.95)             | 1.73 (1.05 to 2.86)                | 13 (5.6)                                                     | 5 (9.4)                              | 1.59 (0.74 to 3.40)              | -                                  |
| <b>Full immunization coverage, No. (%)</b>       |                                                        |                                      |                                 |                                    |                                                              |                                      |                                  |                                    |
| Yes                                              | 274 (88.4)                                             | 61 (84.7)                            | 0.73 (0.44 to 1.22)             | -                                  | 207 (91.2)                                                   | 42 (89.4)                            | 0.81 (0.33 to 1.96)              | -                                  |
| <b>Nutritional Status<sup>b</sup>, No. (%)</b>   |                                                        |                                      |                                 |                                    |                                                              |                                      |                                  |                                    |
| Thinness                                         | 37 (15.3)                                              | 11 (18.0)                            | 1.30 (0.92 to 1.84)             | -                                  | 26 (17.1)                                                    | 6 (15.4)                             | 1.17 (0.62 to 2.20)              | -                                  |
| Normal Weight                                    | 149 (61.6)                                             | 34 (55.8)                            | Ref.                            | -                                  | 95 (62.5)                                                    | 21 (53.9)                            | Ref.                             | -                                  |
| Overweight                                       | 31 (12.8)                                              | 5 (8.2)                              | 0.71 (0.21 to 2.34)             | -                                  | 15 (9.9)                                                     | 4 (10.3)                             | 0.92 (0.38 to 2.22)              | -                                  |
| Obese                                            | 25 (10.33)                                             | 11 (18.0)                            | 1.93 (0.81 to 4.59)             | -                                  | 16 (10.5)                                                    | 8 (20.5)                             | 1.44 (0.67 to 3.09)              | -                                  |
| <b>Co-morbidities- No. (%)</b>                   |                                                        |                                      |                                 |                                    |                                                              |                                      |                                  |                                    |
| Chronic lung disease                             | 58 (13.8)                                              | 11 (13.6)                            | 0.98 (0.25 to 3.91)             | -                                  | 53 (20.0)                                                    | 10 (18.5)                            | 0.91 (0.22 to 3.79)              | -                                  |
| Congenital heart disease                         | 9 (2.1)                                                | 3 (3.7)                              | 1.75 (0.54 to 5.69)             | -                                  | 4 (1.5)                                                      | 1 (1.8)                              | 1.23 (0.12 to 12.05)             | -                                  |
| Chronic gastrointestinal disease                 | 6 (1.4)                                                | 1 (1.2)                              | 0.86 (0.73 to 10.18)            | -                                  | 4 (1.5)                                                      | 0 (0.0)                              | -                                | -                                  |
| Neurologic disease                               | 41 (9.8)                                               | 11 (13.6)                            | 1.45 (0.74 to 2.83)             | -                                  | 33 (12.4)                                                    | 9 (16.7)                             | 1.41 (0.70 to 2.80)              | -                                  |

|                                 |           |           |                      |                      |           |           |                     |                     |
|---------------------------------|-----------|-----------|----------------------|----------------------|-----------|-----------|---------------------|---------------------|
| Metabolic or endocrine disorder | 4 (0.9)   | 3 (3.7)   | 3.99 (1.35 to 11.76) | 5.19 (1.97 to 13.62) | 3 (1.1)   | 1 (1.8)   | 1.65 (0.63 to 4.28) | -                   |
| Immune deficiency               | 57 (13.6) | 18 (22.2) | 1.81 (0.96 to 3.43)  | 1.83 (1.02 to 3.28)  | 42 (15.8) | 12 (22.2) | 1.52 (0.83 to 2.78) | 1.91 (1.03 to 3.53) |
| Preterm birth                   | 17 (4.1)  | 7 (8.6)   | 2.24 (1.26 to 3.95)  | 2.33 (1.30 to 4.19)  | 14 (5.3)  | 7 (13.0)  | 2.67 (1.41 to 5.05) | 2.45 (1.35 to 4.42) |

Abbreviations: OR, odds ratio; IQR, interquartile range; WBC, white blood cell count

<sup>a</sup> Race/ethnic group was collected by study personnel based on auto reporting by the study participants. "Mixed race" refers to an individual of mixed European/Native heritage. <sup>b</sup> Nutritional status was classified based on standard deviations for body mass index according to the World Health Organization into thinness (below -2 standard deviations [SD]), normal nutritional status (between -2 and +1 SD), overweight (between +1 and +2 SD) and obesity (above +2 SD). Body mass index was calculated as weight in kilograms divided by height in meters squared. <sup>c</sup> Values < 11 g/dL. <sup>d</sup> platelets <150,000 x 10<sup>3</sup> cells/uL.

\* Number of patients with available data



|                                                      |                                        |                                        |                                            |                     |                                        |                                         |                                             |                     |
|------------------------------------------------------|----------------------------------------|----------------------------------------|--------------------------------------------|---------------------|----------------------------------------|-----------------------------------------|---------------------------------------------|---------------------|
| No.*<br>Median (IQR)                                 | 394<br>2.8 (1.6 to 4.6)                | 76<br>3.0 (0.9 to 5.2)                 | 1.03 (0.96 to 1.10)                        |                     | 243<br>2.6 (1.3 to 4.1)                | 50<br>3.1 (0.7 to 5.6)                  | 1.03 (1.01 to 1.05)                         | -                   |
| Neutrophil to lymphocyte ratio                       |                                        |                                        |                                            | -                   |                                        |                                         |                                             |                     |
| No.*<br>Median (IQR)<br>Values > 5                   | 393<br>1.8 (0.7 to 4.3)<br>86 (21.9)   | 76<br>1.8 (0.8 to 4.8)<br>18 (23.7)    | 1.01 (0.95 to 1.08)<br>1.11 (0.63 to 1.96) |                     | 242<br>2.1 (0.8 to 5.0)<br>60 (24.8)   | 50<br>1.4 (0.6 to 4.3)<br>11 (22.0)     | 0.972 (0.92 to 1.02)<br>0.87 (0.47 to 1.58) | -                   |
| C-reactive protein (mg/dL)                           |                                        |                                        |                                            | -                   |                                        |                                         |                                             |                     |
| No.*<br>Median (IQR)<br>Values > 50 mg/dL            | 332<br>12.9 (4.2 to 39.5)<br>70 (21.1) | 70<br>18.9 (7.0 to 102.7)<br>23 (32.9) | 1.04 (1.02 to 1.05)<br>1.83 (1.04 to 3.22) |                     | 216<br>16.5 (9.0 to 48.0)<br>53 (24.5) | 48<br>22.3 (10.0 to 100.9)<br>17 (35.4) | 1.04 (1.02 to 1.06)<br>1.76 (1.04 to 2.96)  | -                   |
| <b>Chest radiograph performed,</b><br><b>No. (%)</b> |                                        |                                        |                                            | -                   |                                        |                                         |                                             |                     |
| Yes                                                  | 313 (74.7)                             | 71 (87.65)                             |                                            |                     | 210                                    | 47                                      |                                             |                     |
| Normal                                               | 194 (62.0)                             | 29 (40.8)                              | Ref.                                       | Ref.                | 141 (67.1)                             | 20 (42.6)                               | Ref.                                        | Ref.                |
| Bronchial wall thickening                            | 28 (8.9)                               | 10 (14.1)                              | 2.39 (0.93 to 6.16)                        | 2.89 (1.21 to 6.92) | 18 (8.6)                               | 9 (19.1)                                | 3.09 (1.36 to 7.05)                         | 3.61 (1.63 to 7.98) |
| Interstitial infiltrates                             | 55 (17.6)                              | 16 (22.5)                              | 1.94 (1.02 to 3.69)                        | 1.08 (0.52 to 2.28) | 27 (12.9)                              | 9 (19.1)                                | 2.21 (0.97 to 4.99)                         | 1.49 (0.56 to 3.99) |
| Consolidation                                        | 23 (7.3)                               | 8 (11.3)                               | 2.33 (1.19 to 4.53)                        | 1.12 (0.49 to 2.56) | 20 (9.5)                               | 6 (12.8)                                | 2.15 (1.21 to 3.83)                         | 1.11 (0.60 to 2.05) |
| Interstitial infiltrates +<br>consolidation          | 13 (4.1)                               | 8 (11.3)                               | 4.12 (1.11 to 15.3)                        | 1.15 (0.24 to 5.45) | 4 (1.9)                                | 3 (6.4)                                 | 4.19 (0.81 to 21.70)                        | 1.28 (0.18 to 9.18) |

**Supplementary Table 8.**

**Risk factors associated with supplementary oxygen requirement among pediatric patients with COVID-19.**

| Characteristic                                                      | Non-oxygen<br>(n=836) | Oxygen<br>(n=227) | Complete Data                          |                                          | Multiple Imputation                    |                                          |
|---------------------------------------------------------------------|-----------------------|-------------------|----------------------------------------|------------------------------------------|----------------------------------------|------------------------------------------|
|                                                                     |                       |                   | Univariable<br>analysis<br>OR (95% CI) | Multivariable<br>analysis<br>OR (95% CI) | Univariable<br>analysis<br>OR (95% CI) | Multivariable<br>analysis<br>OR (95% CI) |
| <b>Age groups, y No. (%)</b>                                        |                       |                   |                                        |                                          |                                        |                                          |
| <1                                                                  | 182 (21.8)            | 59 (26.0)         | 1.14 (0.85 to 1.53)                    | 2.09 (1.23 to 3.53)                      | 1.14 (0.85 to 1.53)                    | 2.09 (1.23 to 3.53)                      |
| 1-5                                                                 | 306 (36.6)            | 80 (35.2)         | 0.92 (0.72 to 1.16)                    | 1.19 (0.81 to 1.73)                      | 0.92 (0.72 to 1.16)                    | 1.19 (0.81 to 1.73)                      |
| 6-9                                                                 | 137 (16.4)            | 39 (17.2)         | Ref.                                   | Ref.                                     | Ref.                                   | Ref.                                     |
| ≥10                                                                 | 211 (25.2)            | 49 (21.6)         | 0.81 (0.50 to 1.32)                    | 0.89 (0.45 to 1.77)                      | 0.81 (0.50 to 1.32)                    | 0.89 (0.45 to 1.77)                      |
| <b>Sex, No. (%)</b>                                                 |                       |                   |                                        |                                          |                                        |                                          |
| Male                                                                | 433 (51.8)            | 137 (60.3)        | Ref.                                   | -                                        | Ref.                                   | -                                        |
| Female                                                              | 403 (48.2)            | 90 (39.6)         | 0.70 (0.50 to 1.00)                    | -                                        | 0.70 (0.50 to 1.00)                    | -                                        |
| <b>Race or ethnic group, No. (%)</b>                                |                       |                   |                                        |                                          |                                        |                                          |
| Caucasian                                                           | 359 (47.6)            | 90 (42.6)         | Ref.                                   | -                                        | Ref.                                   | -                                        |
| Native                                                              | 11 (1.4)              | 5 (2.4)           | 1.86 (0.84 to 4.15)                    | -                                        | 1.87 (0.83 to 4.19)                    | -                                        |
| Black or African American                                           | 9 (1.2)               | 0 (0.0)           | -                                      | -                                        | -                                      | -                                        |
| Mixed race                                                          | 387 (49.9)            | 116 (55.0)        | 1.23 (0.66 to 2.28)                    | -                                        | 1.23 (0.71 to 2.14)                    | -                                        |
| <b>Population, No. (%)</b>                                          |                       |                   |                                        |                                          |                                        |                                          |
| Urban                                                               | 622 (92.1)            | 185 (90.2)        | Ref.                                   | -                                        | Ref.                                   | -                                        |
| Rural                                                               | 53 (7.8)              | 20 (9.8)          | 1.27 (0.78 to 2.06)                    | -                                        | 1.26 (0.76 to 2.10)                    | -                                        |
| <b>Full immunization coverage, No. (%)</b>                          |                       |                   |                                        |                                          |                                        |                                          |
| Yes                                                                 | 610 (90.1)            | 160 (87.9)        | 0.80 (0.45 to 1.41)                    | -                                        | 0.78 (0.44 to 1.37)                    | -                                        |
| <b>BMI (continuous), No. (%)</b>                                    |                       |                   |                                        |                                          |                                        |                                          |
| Thinness                                                            | 36 (8.4)              | 29 (21.3)         | 2.87 (1.82 to 4.51)                    | -                                        | 1.70 (0.86 to 3.39)                    | -                                        |
| Normal Weight                                                       | 278 (65.3)            | 78 (57.3)         | Ref.                                   | -                                        | Ref.                                   | -                                        |
| Overweight                                                          | 70 (16.4)             | 13 (9.6)          | 0.66 (0.43 to 1.02)                    | -                                        | 0.81 (0.50 to 1.32)                    | -                                        |
| Obese                                                               | 42 (9.9)              | 16 (11.8)         | 1.36 (0.69 to 2.76)                    | -                                        | 1.16 (0.66 to 2.03)                    | -                                        |
| <b>Co-morbidities- No. (%)</b>                                      |                       |                   |                                        |                                          |                                        |                                          |
| Chronic lung disease                                                | 70 (8.4)              | 53 (23.3)         | 3.33 (2.05 to 5.41)                    | 4.45 (2.35 to 8.41)                      | 3.33 (2.05 to 5.41)                    | 4.45 (2.35 to 8.41)                      |
| Congenital heart disease                                            | 12 (1.4)              | 6 (2.6)           | 1.86 (0.49 to 7.07)                    | -                                        | 1.86 (0.49 to 7.01)                    | -                                        |
| Chronic gastrointestinal disease                                    | 6 (0.7)               | 3 (1.3)           | 1.85 (0.41 to 8.39)                    | -                                        | 1.85 (0.41 to 8.39)                    | -                                        |
| Neurologic disease                                                  | 29 (3.5)              | 30 (13.2)         | 4.24 (2.78 to 6.46)                    | 5.21 (3.30 to 8.24)                      | 4.24 (2.78 to 6.46)                    | 5.21 (3.30 to 8.24)                      |
| Metabolic or endocrine disorder                                     | 5 (0.6)               | 3 (1.3)           | 2.22 (0.50 to 9.91)                    | -                                        | 2.22 (0.50 to 9.91)                    | -                                        |
| Immune deficiency                                                   | 52 (6.2)              | 36 (15.9)         | 2.84 (2.09 to 3.85)                    | 4.44 (2.56 to 7.69)                      | 2.84 (2.09 to 3.85)                    | 4.44 (2.56 to 7.69)                      |
| Preterm birth                                                       | 18 (2.1)              | 15 (6.6)          | 3.21 (1.50 to 6.87)                    | -                                        | 3.21 (1.50 to 6.88)                    | -                                        |
| <b>Symptoms or Signs described or present on admission- No. (%)</b> |                       |                   |                                        |                                          |                                        |                                          |
| Anosmia                                                             | 22 (3.7)              | 3 (2.0)           | 0.54 (0.12 to 2.49)                    | -                                        | -                                      | -                                        |
| Dysgeusia                                                           | 23 (3.8)              | 4 (2.7)           | 0.69 (0.18 to 2.66)                    | -                                        | -                                      | -                                        |
| Skin rash                                                           | 28 (3.4)              | 6 (2.7)           | 0.79 (0.39 to 1.61)                    | -                                        | 0.79 (0.38 to 1.61)                    | -                                        |
| Conjunctivitis                                                      | 12 (1.4)              | 3 (1.3)           | 0.92 (0.44 to 1.95)                    | -                                        | 0.96 (0.43 to 2.13)                    | -                                        |
| Abdominal pain                                                      | 115 (14.4)            | 12 (5.6)          | 0.35 (0.12 to 0.99)                    | -                                        | 0.36 (0.13 to 0.99)                    | -                                        |
| Fever                                                               | 596 (71.4)            | 149 (65.6)        | 0.77 (0.33 to 1.77)                    | -                                        | 0.77 (0.33 to 1.77)                    | -                                        |

|                       |            |            |                       |                        |                        |                        |
|-----------------------|------------|------------|-----------------------|------------------------|------------------------|------------------------|
| Cough                 | 419 (50.2) | 161 (71.2) | 2.46 (1.02 to 5.93)   | -                      | 2.46 (1.02 to 5.92)    | -                      |
| Pharyngitis           | 214 (25.7) | 34 (15.1)  | 0.51 (0.35 to 0.76)   | 0.68 (0.46 to 0.99)    | 0.51 (0.35 to 0.75)    | 0.64 (0.46 to 0.90)    |
| Rhinitis              | 247 (29.6) | 67 (29.6)  | 1.00 (0.56 to 1.78)   | -                      | 1.01 (0.57 to 1.79)    | -                      |
| Headache              | 146 (17.5) | 16 (7.1)   | 0.36 (0.19 to 0.70)   | -                      | 0.36 (0.18 to 0.69)    | -                      |
| Myalgia               | 72 (8.7)   | 18 (8.0)   | 0.92 (0.37 to 2.27)   | -                      | 0.91 (0.37 to 2.26)    | -                      |
| Malaise               | 268 (32.2) | 73 (32.4)  | 1.01 (0.67 to 1.54)   | -                      | 1.01 (0.66 to 1.54)    | -                      |
| Diarrhea              | 194 (23.3) | 25 (11.1)  | 0.41 (0.19 to 0.89)   | -                      | 0.41 (0.19 to 0.90)    | -                      |
| Vomit                 | 174 (20.8) | 25 (11.2)  | 0.48 (0.25 to 0.89)   | 0.39 (0.17 to 0.90)    | 0.48 (0.25 to 0.90)    | 0.38 (0.17 to 0.84)    |
| Dyspnea               | 63 (7.6)   | 168 (74.0) | 34.8 (18.5 to 65.4)   | 32.64 (17.24 to 61.81) | 34.84 (18.55 to 65.45) | 32.53 (17.35 to 60.99) |
| Altered mental status | 14 (1.7)   | 29 (12.8)  | 8.60 (4.62 to 16.01)  | 7.01 (1.94 to 25.27)   | 8.56 (4.60 to 15.95)   | 5.85 (1.44 to 23.85)   |
| Seizures              | 29 (3.5)   | 17 (7.5)   | 2.25 (1.02 to 5.02)   | -                      | 2.24 (0.99 to 5.01)    | -                      |
| Dehydration           | 39 (4.7)   | 28 (12.4)  | 2.86 (1.58 to 5.17)   | 2.60 (1.28 to 5.27)    | 2.83 (1.60 to 5.00)    | 2.55 (1.22 to 5.31)    |
| Shock                 | 5 (0.6)    | 23 (10.2)  | 18.72 (7.53 to 46.50) | -                      | 18.63 (7.47 to 46.78)  | -                      |
